# Supplementary material for: Prognostic Value of Axillary Nodal Ratio after Neoadjuvant Chemotherapy of Doxorubicin/Cyclophosphamide Followed by Docetaxel in Breast Cancer: A Multicenter Retrospective Cohort Study
Source: PubMed Central journal article supplement — Cancer Res Treat. 2016 Mar 23;48(4):1373–81. doi: 10.4143/crt.2015.475 (PMC5080811; doi:10.4143/crt.2015.475), 2016-03-23
Supplement: crt-2015-475-supple.pdf [file crt-2015-475-supple.pdf]

# Prognostic Value of Axillary Nodal Ratio after Neoadjuvant Chemotherapy of Doxorubicin/Cyclophosphamide Followed by Docetaxel in Breast Cancer: A Multicenter Retrospective Cohort Study

**Se Hyun Kim, MD<sup>1</sup>, Kyung Hae Jung, MD<sup>2</sup>, Tae-Yong Kim, MD<sup>3</sup>, Seock-Ah Im, MD<sup>3</sup>, In Sil Choi, MD<sup>4</sup>, Yee Soo Chae, MD<sup>5</sup>, Sun Kyung Baek, MD<sup>6</sup>, Seok Yun Kang, MD<sup>7</sup>, Sarah Park, MD<sup>8</sup>, In Hae Park, MD<sup>9</sup>, Keun Seok Lee, MD<sup>9</sup>, Yoon Ji Choi, MD<sup>10</sup>, Soohyeon Lee, MD<sup>11</sup>, Joo Hyuk Sohn, MD<sup>11</sup>, Yeon-Hee Park, MD<sup>12</sup>, Young-Hyuck Im, MD<sup>12</sup>, Jin-Hee Ahn, MD<sup>2</sup>, Sung-Bae Kim, MD<sup>2</sup>, Jee Hyun Kim, MD<sup>1</sup>**

<sup>1</sup>Division of Hematology and Medical Oncology, Department of Internal Medicine, Seoul National University Bundang Hospital, Seongnam,

<sup>2</sup>Department of Internal Medicine, Asan Medical Center, University of Ulsan College of Medicine, Seoul,

<sup>3</sup>Department of Internal Medicine, Seoul National University Hospital, Seoul,

<sup>4</sup>Department of Internal Medicine, SMG-SNU Boramae Medical Center, Seoul,

<sup>5</sup>Department of Internal Medicine, Kyungpook National University Hospital, Daegu,

<sup>6</sup>Department of Internal Medicine, Kyung Hee University Medical Center, Seoul,

<sup>7</sup>Department of Internal Medicine, Ajou University Hospital, Suwon,

<sup>8</sup>Department of Internal Medicine, Seoul St. Mary's Hospital, College of Medicine, The Catholic University of Korea, Seoul,

<sup>9</sup>Department of Internal Medicine, National Cancer Center, Goyang,

<sup>10</sup>Department of Internal Medicine, Korea University Anam Hospital, Seoul,

<sup>11</sup>Department of Internal Medicine, Severance Hospital, Yonsei University College of Medicine, Seoul,

<sup>12</sup>Department of Internal Medicine, Samsung Medical Center, Seoul, Korea

## Supplementary Data

### Table of Contents

|                             |   |
|-----------------------------|---|
| Supplementary Table 1 ..... | 2 |
| Supplementary Table 2 ..... | 2 |
| Supplementary Table 3 ..... | 2 |
| Supplementary Table 4 ..... | 3 |
| Supplementary Table 5 ..... | 3 |

**Supplementary Table 1.** Retrieved LNs after surgery

| No. of retrieved LNs | No. (%)    |
|----------------------|------------|
| 1-3                  | 40 (5.0)   |
| 4-9                  | 221 (27.7) |
| More than 10         | 538 (67.3) |

LN, lymph node.

**Supplementary Table 2.** Relapse pattern according to LNR status

| LNR          | No recur   | Locoregional | Distant only | Locoregional+Distant |
|--------------|------------|--------------|--------------|----------------------|
| Low          | 494 (86.2) | 25 (4.4)     | 45 (7.9)     | 9 (1.6)              |
| Intermediate | 119 (70)   | 20 (11.8)    | 23 (13.5)    | 8 (4.7)              |
| High         | 34 (61.8)  | 6 (10.9)     | 10 (18.2)    | 5 (9.1)              |

Values are presented as number (%). Chi-square  $p < 0.001$ . LNR, lymph node ratio.

**Supplementary Table 3.** Multivariate analysis models for relapse-free survival

| Variable                             | Model with ypN stage (without LNR) <sup>a)</sup> |            |         | Model with LNR (without ypN stage) <sup>b)</sup> |            |         |
|--------------------------------------|--------------------------------------------------|------------|---------|--------------------------------------------------|------------|---------|
|                                      | Hazard ratio                                     | 95% CI     | p-value | Hazard ratio                                     | 95% CI     | p-value |
| Age (< 50 yr vs. > 50 yr)            | 0.77                                             | 0.54-1.11  | 0.173   | 0.77                                             | 0.54-1.10  | 0.159   |
| Histologic grade 1                   | 1                                                |            | 0.001   | 1                                                |            | < 0.001 |
| Histologic grade 2                   | 1.20                                             | 0.37-3.89  |         | 1.24                                             | 0.38-4.05  |         |
| Histologic grade 3                   | 2.54                                             | 0.77-8.38  |         | 2.67                                             | 0.81-8.80  |         |
| Histologic grade NA                  | 1.24                                             | 0.32-4.83  |         | 1.30                                             | 0.33-5.08  |         |
| Subtype: HR+/HER2-                   | 1                                                |            | < 0.001 | 1                                                |            | < 0.001 |
| Subtype: HER2+                       | 1.68                                             | 1.02-2.76  |         | 1.69                                             | 1.02-2.80  |         |
| Subtype: TNBC                        | 4.98                                             | 3.26-7.62  |         | 4.83                                             | 3.17-7.36  |         |
| pCR (ypT0/isN0) vs. non-pCR          | 0.26                                             | 0.08-0.86  | 0.027   | 0.17                                             | 0.05-0.50  | 0.001   |
| ypT stage 0                          | 1                                                |            | < 0.001 | 1                                                |            | < 0.001 |
| ypT stage 1                          | 0.85                                             | 0.40-1.84  |         | 0.65                                             | 0.31-1.37  |         |
| ypT stage 2                          | 1.94                                             | 0.90-4.20  |         | 1.59                                             | 0.75-3.39  |         |
| ypT stage 3                          | 1.68                                             | 0.72-3.97  |         | 1.33                                             | 0.58-3.09  |         |
| ypT stage 4                          | 5.80                                             | 1.62-20.78 |         | 5.15                                             | 1.47-18.02 |         |
| ypN stage 0                          | 1                                                |            | < 0.001 | -                                                |            | -       |
| ypN stage 1                          | 1.72                                             | 1.05-2.81  |         | -                                                | -          |         |
| ypN stage 2                          | 2.74                                             | 1.58-4.75  |         | -                                                | -          |         |
| ypN stage 3                          | 3.61                                             | 1.99-6.55  |         | -                                                | -          |         |
| Lymphovascular invasion (yes vs. no) | 1.51                                             | 1.02-2.22  | 0.039   | 1.64                                             | 1.11-2.41  | 0.012   |
| LNR low (0-0.20)                     | -                                                |            | -       | 1                                                |            | 0.002   |
| LNR intermediate (0.21-0.65)         | -                                                |            |         | 1.82                                             | 1.21-2.76  |         |
| LNR high (0.66-1.00)                 | -                                                |            |         | 2.46                                             | 1.38-4.38  |         |

LNR, lymph node ratio; CI, confidence interval; NA, not available; HR, hormone receptor; HER2, human epidermal receptor 2; TNBC, triple negative breast cancer; pCR, pathologic complete response. <sup>a)</sup>-2 Log likelihood=1,665, chi-square=214, <sup>b)</sup>-2 Log likelihood=1,674, chi-square=196.

**Supplementary Table 4.** Multivariate analysis<sup>a)</sup> for relapse-free survival of patients in each subtype

| Subtype                      | Hazard ratio of recurrence |         |       |         |      |         |
|------------------------------|----------------------------|---------|-------|---------|------|---------|
|                              | HR+/HER2-                  | p-value | HER2+ | p-value | TNBC | p-value |
| LNR low (0-0.20)             | 1                          | 0.58    | 1     | 0.08    | 1    | 0.40    |
| LNR intermediate (0.21-0.65) | 0.65                       |         | 5.56  |         | 1.39 |         |
| LNR high (0.66-1.00)         | 0.93                       |         | 5.50  |         | 0.68 |         |

HR, hormone receptor; HER2, human epidermal receptor 2; TNBC, triple negative breast cancer; LNR, lymph node ratio.  
<sup>a)</sup>Adjusted for age, histologic grade, pathological complete response, ypT stage, ypN stage, and lymphovascular invasion.

**Supplementary Table 5.** Efficacy of NCT and prognostic value of LNR system

| Study author                         | This study (n=799) | Keam et al. [17] (n=205) | Chen et al. [19] (n=569) |
|--------------------------------------|--------------------|--------------------------|--------------------------|
| <b>Result</b>                        | ypN ≥ LNR          | LNR better               | LNR better               |
| <b>No. of cycles of NCT</b>          | 8                  | 3                        | 3                        |
| <b>pCR rate (%)</b>                  | 16.10              | 6.80                     | 10.70                    |
| <b>No. of involved LNs after NCT</b> |                    |                          |                          |
| 0                                    | 41.9               | 29.8                     | 28.3                     |
| 1-3                                  | 35.8               | 31.7                     | 28.8                     |
| 4-9                                  | 14.5               | 23.9                     | 23.7                     |
| ≥ 10                                 | 7.8                | 14.6                     | 19.2                     |

LNR, lymph node ratio; NCT, neoadjuvant chemotherapy; pCR, pathologic complete response; LN, lymph node.
